JULY 2016 | VOLUME 173 | NUMBER 7

# The American Journal of Psychiatry

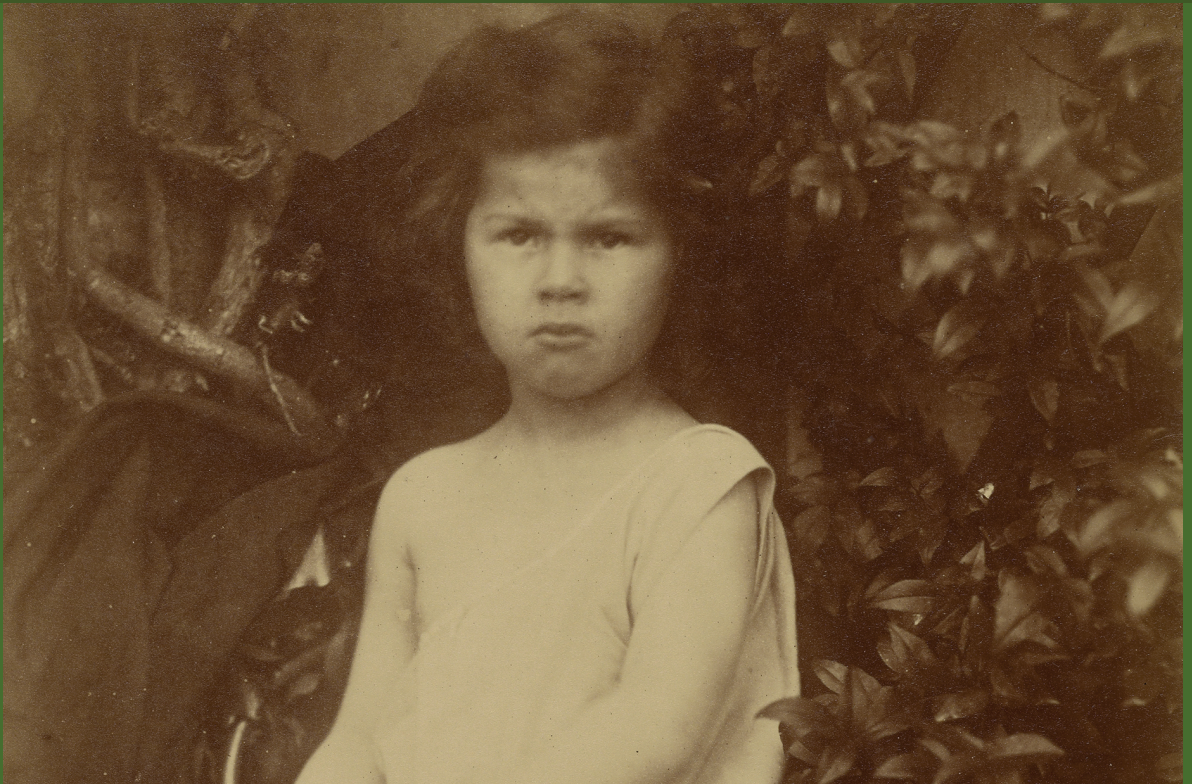

Neural Correlates of Irritability in Disruptive Mood Dysregulation  
and Bipolar Disorders

Fluidity of the Subsyndromal Phenomenology of Borderline Personality Disorder  
Over 16 Years of Prospective Follow-Up

Toward the Definition of a Bipolar Prodrome: Dimensional Predictors of  
Bipolar Spectrum Disorders in At-Risk Youths

Distress During Pregnancy: Epigenetic Regulation of Placenta  
Glucocorticoid-Related Genes and Fetal Neurobehavior

AMERICAN  
**PSYCHIATRIC**  
ASSOCIATION 

[ajp.psychiatryonline.org](http://ajp.psychiatryonline.org)
