## PERSPECTIVAS

### EDITORIALES

- 651 El valor de las observaciones clínicas repetidas a lo largo del tiempo**  
*Kenneth R. Silk, M.D.*
- 653 Mecanismos que diferencian la irritabilidad en niños y adolescentes**  
*Daniel P. Dickstein, M.D.*
- 655 El estrés, la placenta y la programación fetal del comportamiento: El primer encuentro de los genes con el entorno**  
*M. Camille Hoffman, M.D., M.S.C.S.*

### TRATAMIENTO EN PSIQUIATRÍA

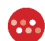

- 658 Un marco para extender los roles de los psiquiatras en el tratamiento de enfermedades generales**  
*Erik R. Vanderlip, M.D., M.P.H., et al.* **EMC • AUDIO • GUÍAS CLÍNICAS**

### IMÁGENES EN PSIQUIATRÍA

- 664 Sorbos de conflicto**  
*Erik Wilkerson, M.S., Carolyn Rodriguez, M.D., Ph.D.*

### DISCURSO PRESIDENCIAL DE LA APA

- 665 Reclamando nuestro futuro**  
*Renee Binder, M.D.*
- 668 Respuesta al discurso presidencial**  
*Maria A. Oquendo, M.D.*
- 671 Renee Binder, M.D., 142<sup>o</sup> Presidente, 2015–2016**  
*Paul Summergrad, M.D.*

### RESÚMENES Y RESEÑAS

- 672 Mensaje para los clínicos: Moderadores y mediadores del resultado del tratamiento en ensayos clínicos aleatorizados**  
*Helena Chmura Kraemer, Ph.D.* **AUDIO**

## NUEVAS INVESTIGACIONES

### ARTÍCULOS

- 680 Psicoterapia interpersonal para problemas de salud mental: Un meta-análisis exhaustivo**  
*Pim Cuijpers, Ph.D., et al.* **AUDIO • VIDEO • GUÍAS CLÍNICAS**
- 688 Fluidez de la fenomenología subsindrómica del trastorno límite de la personalidad en 16 años de seguimiento prospectivo**  
*Mary C. Zanarini, Ed.D., et al.* **EDITORIAL • EMC • AUDIO • GUÍAS CLÍNICAS**
- 695 Hacia la definición del pródromo bipolar: Predictores dimensionales de los trastornos del espectro bipolar en jóvenes en riesgo**  
*Danella M. Hafeman, M.D., Ph.D., et al.* **EDITORIAL • AUDIO • VIDEO • GUÍAS CLÍNICAS**
- 705 Angustia durante el embarazo: Regulación epigenética de los genes relacionados con los glucocorticoides en la placenta y del neurocomportamiento fetal**  
*Catherine Monk, Ph.D., et al.* **EDITORIAL • EMC • AUDIO**
- 714 Fosfodiesterasa 10A en esquizofrenia: Un estudio con PET utilizando [<sup>11</sup>C]IMA107**  
*Tiago Reis Marques, M.D., Ph.D., et al.*
- 722 Correlatos neurales de la irritabilidad en los trastornos bipolar y de desregulación disruptiva del ánimo**  
*Jillian Lee Wiggins, Ph.D., et al.* **EDITORIAL**

CARTAS AL EDITOR

- 731 **El papel de la TEC bilateral cuando la TEC unilateral derecha es inferior**  
*Charles H. Kellner, M.D., Kate G. Farber, B.A.*
- 731 **Respuesta a Kellner y Farber: Abordando el paso de TEC unilateral derecha en dosis altas a TEC bitemporal**  
*Declan M. McLoughlin, Ph.D., M.R.C.Psych., [on behalf of the authors]*
- 732 **A favor de los marcadores en neuroimágenes de la respuesta al tratamiento en el primer episodio de esquizofrenia**  
*Deepak K. Sarpal, M.D., et al.*
- 733 **Respuesta a Sarpal et al.: Importancia de los biomarcadores en las neuroimágenes para el desarrollo de tratamientos y la práctica clínica**  
*Qiyong Gong, M.D., Ph.D.*
- 734 **Diferencias regionales potenciales en los niveles GABA en pacientes con psicosis comparados con sujetos de control**  
*Camilo de la Fuente-Sandoval, M.D., Ph.D.*
- 734 **Respuesta a de la Fuente-Sandoval: Retos para medir los niveles de GABA en pacientes con psicosis**  
*Stefano Marenco, M.D.*

RESEÑAS BIBLIOGRÁFICAS

- 736 **Rational Suicide, Irrational Laws: Examining Current Approaches to Suicide in Policy and Law [Suicidio racional, leyes irracionales: Examinando enfoques actuales al suicidio en políticas y leyes]**  
*Franklin G. Miller, Ph.D.*
- 737 **Complementary and Integrative Therapies for Mental Health and Aging [Terapias complementarias e integrativas para salud mental y envejecimiento]**  
*Donovan T. Maust, M.D., M.S.*
- 738 **Youth Substance Abuse and Co-occurring Disorders [Abuso de sustancias en los jóvenes y trastornos concurrentes]**  
*Sean R. LeNoue, M.D.*

739 Libros recibidos

ACTOS OFICIALES DE LA APA

740 Informes para los socios

OTROS TEMAS DE INTERÉS

- 735 [Correction]
- 751 Educación Médica Continuada

**Cubierta:** [Bipolar disorder and disruptive mood dysregulation disorder (DMDD) in children may be clinically distinct, but irritability is a feature common to both illnesses. Wiggins and colleagues (p. 722) examined emotional responses to facial expressions in both illnesses. The full range of emotional response is linked to amygdala activity in the children with DMDD, while only fearful expression elicits amygdala activity in children with bipolar disorder. (Digital image courtesy The Getty's Open Content Program. Julia Margaret Cameron [British, born India, 1815–1879]; *Study of Child St. John*, 1872, albumen silver print; The J. Paul Getty Museum, Los Angeles.)]

Article content that addresses **Core Competencies**, defined by the Accreditation Council of Graduate Medical Education and the American Board of Medical Specialties, is indicated by the following symbols:

|                                                                                                                            |                                                                                                                             |
|----------------------------------------------------------------------------------------------------------------------------|-----------------------------------------------------------------------------------------------------------------------------|
|  Professionalism                        |  Patient Care and Procedural Skills      |
|  Medical Knowledge                      |  Practice-Based Learning and Improvement |
|  Interpersonal and Communication Skills |  Systems-Based Practice.                 |

More information is available at [www.abms.org/maintenance\\_of\\_certification/MOC\\_competencies.aspx](http://www.abms.org/maintenance_of_certification/MOC_competencies.aspx)

- AUDIO** Highlighted in AJP Audio, a downloadable .mp3 file available at [ajp.psychiatryonline.org](http://ajp.psychiatryonline.org)
- CME** A course covering the content of this article is available online for paid subscribers to the AJP CME Course program
- EDITORIAL** Discussed in one of the issue's editorials
- GUÍAS CLÍNICAS** Clinical Guidance provided on the English table of contents
- VIDEO** Highlighted online by Deputy Editor Daniel S. Pine, M.D.

**La Tabla de Contenidos y resúmenes de Este Número Está Disponible en Español**  
*(This issue's Table of Contents and abstracts are available in Spanish)*

Translation presented in collaboration with the Office of Global Health, Rutgers-Robert Wood Johnson Medical School

Support for this effort provided by ACTA Colombia.

**Translation courtesy of**  
**Sergi Casals, M.A.**, Garuna, Medellín, Colombia ([www.garunaeditors.com](http://www.garunaeditors.com))  
**Carlos Lopez Jaramillo, M.D.**, Universidad de Antioquia, Medellín, Colombia  
**Javier I. Escobar, M.D., M.Sc.**, Rutgers-Robert Wood Johnson Medical School

# Mensaje para los clínicos: Moderadores y mediadores del resultado del tratamiento en ensayos clínicos aleatorizados

Helena Chmura Kraemer, Ph.D.

Muchos problemas en el diseño, la ejecución, el análisis, la presentación y la interpretación de los ensayos clínicos aleatorizados se deben, en parte, a una comprensión inadecuada de los roles de los moderadores y los mediadores del resultado del tratamiento. Como consecuencia, 1) los resultados de las investigaciones clínicas tardan en tener impacto sobre la toma de decisiones clínicas y por lo tanto en beneficiar a los pacientes; 2) es difícil para los clínicos o los pacientes aplicar los resultados de ensayos clínicos aleatorizados que comparan dos tratamientos (tratamiento vs. control); 3) cuando estos ensayos se realizan en diferentes sedes, los resultados a menudo no se replican; 4) cuando los resultados influyen la toma de decisiones clínicas, los resultados que obtienen los clínicos no coinciden con lo que reportan los investigadores; y 5) los efectos del tratamiento al comparar los pacientes tratados y los controles, particularmente para los tratamientos

psiquiátricos, a menudo parecen triviales. En este artículo de revisión, el autor revisa e integra la literatura metodológica acerca de tratar con covariables en los ensayos, para enfatizar su impacto en la toma de decisiones clínicas. El objetivo de los ensayos debería, en última instancia, establecer quiénes deberían estar en el grupo de de tratamiento más que en el grupo control (moderadores) y determinar cómo obtener los mejores resultados con el que sea el tratamiento preferido (mediadores). El autor da recomendaciones a los clínicos sobre qué ensayos es mejor ignorar y qué ensayos deben ser examinados cuidadosamente, y urge a los investigadores clínicos a centrarse en los estudios diseñados para reducir la carga de la enfermedad mental en los pacientes.

*(Am J Psychiatry 2016; 173:672–679)*

## Psicoterapia interpersonal para problemas de salud mental: Un meta-análisis exhaustivo

Pim Cuijpers, Ph.D., Tara Donker, Ph.D., Myrna M. Weissman, Ph.D., Paula Ravitz, M.D., Ioana A. Cristea, Ph.D.

**Objetivo:** La psicoterapia interpersonal (IPT, por sus siglas en inglés) se ha desarrollado para el tratamiento de la depresión, pero se ha examinado para varios otros trastornos mentales. Se realizó un meta-análisis exhaustivo de todos los ensayos aleatorizados que examinan los efectos de la IPT para todos los problemas de salud mental.

**Método:** Se realizaron búsquedas en *PubMed*, *PsycInfo*, *Embase* y *Cochrane* con el fin de identificar todos los ensayos que examinan la IPT para cualquier problema de salud mental.

**Resultados:** Se incluyeron 90 estudios con 11.434 participantes. La IPT para la depresión en fase aguda tuvo efectos entre moderados y altos en comparación con los grupos control ( $g=0,60$ ; IC 95% CI=0,45–0,75). No se encontró ninguna diferencia significativa con otras terapias (diferencial  $g=0,06$ ) ni con la farmacoterapia ( $g=-0,13$ ). El tratamiento combinado fue más efectivo que la IPT sola ( $g=0,24$ ). La IPT en la depresión subumbral previno de manera significativa el

inicio de la depresión mayor, y el mantenimiento de la IT redujo la recaída de manera significativa. La IPT tuvo efectos significativos en los trastornos alimentarios, pero probablemente los efectos son ligeramente inferiores que los de la terapia cognitivo-conductual (TCC) en la fase aguda del tratamiento. En los trastornos de ansiedad, la IPT tuvo efectos grandes en comparación con los grupos control y no hay evidencia de que la IPT fuera menos efectiva que la TCC. Hubo riesgo de sesgo tal como lo define la *Cochrane Collaboration* en la mayoría de los estudios. Hubo pocos indicios de que la presencia del sesgo influenciara el resultado.

**Conclusiones:** La IPT es efectiva en el tratamiento agudo de la depresión y puede ser efectiva en la prevención de nuevos trastornos depresivos y en la prevención de recaídas. La IPT también puede ser efectiva en el tratamiento de trastornos alimentarios y trastornos de ansiedad y ha mostrado efectos prometedores en otros trastornos de salud mental.

(*Am J Psychiatry* 2016; 173:680–687)

## Fluidez de la fenomenología subsindrómica del trastorno límite de la personalidad en 16 años de seguimiento prospectivo

Mary C. Zanarini, Ed.D., Frances R. Frankenburg, M.D., D. Bradford Reich, M.D., Garrett M. Fitzmaurice, Sc.D.

**Objetivo:** El objetivo de este estudio fue determinar las tasas acumulativas de la remisión de 2 y de 4 años y las recurrencias que las siguen, de 24 síntomas del trastorno límite de la personalidad a lo largo de 16 años de seguimiento prospectivo.

**Método:** Un total de 290 pacientes que cumplían rigurosos criterios para el trastorno límite de la personalidad y 72 pacientes eje II de comparación fueron evaluados durante su admisión inicial utilizando una serie de entrevistas diagnósticas semiestructuradas. Los mismos instrumentos se administraron nuevamente en ocho períodos contiguos de dos años.

**Resultados:** Fue mucho más probable que remitieran los 12 síntomas agudos (ej. auto-mutilación, intentos de suicidio

con búsqueda de ayuda) del trastorno límite de la personalidad, por un período de 2 años y por un período de 4 años, que los 12 síntomas temperamentales (ej. ira crónica/ actos iracundos frecuentes, intolerancia de la soledad) de este trastorno. Igualmente, fue menos probable que estos síntomas agudos recurrieran después de una remisión por 2 años o de una remisión por 4 años.

**Conclusiones:** En conjunto, los síntomas del trastorno límite de la personalidad son bastante fluidos, y las remisiones y las recurrencias son comunes. Sin embargo, los síntomas agudos clínicamente más urgentes del trastorno límite de la personalidad parecen tener un mejor pronóstico que los síntomas temperamentales menos turbulentos del trastorno.

*(Am J Psychiatry 2016; 173:688–694)*

## Hacia la definición del pródromo bipolar: Predictores dimensionales de los trastornos del espectro bipolar en jóvenes en riesgo

Danella M. Hafeman, M.D., Ph.D., John Merranko, M.A., David Axelson, M.D., Benjamin I. Goldstein, M.D., Ph.D., Tina Goldstein, Ph.D., Kelly Monk, B.S.N., R.N., Mary Beth Hickey, B.A., Dara Sakolsky, M.D., Ph.D., Rasim Diler, M.D., Satish Iyengar, Ph.D., David Brent, M.D., David Kupfer, M.D., Boris Birmaher, M.D.

**Objetivo:** Los autores buscaron evaluar los predictores sintomáticos dimensionales de los trastornos del espectro bipolar de nuevo inicio en jóvenes con riesgo familiar de trastorno bipolar (jóvenes «en riesgo»).

**Método:** Los sujetos fueron niños de entre 6 y 18 años de padres con trastorno bipolar I o II (N=359) y niños de la comunidad (N=220), para comparación. Al comienzo del seguimiento, 8,4% de los niños de padres bipolares tenían un trastorno del espectro bipolar. A lo largo de 8 años, 14,7% de los niños para quienes había datos de seguimiento (44/299) desarrollaron un trastorno del espectro bipolar de nuevo inicio (15 con trastorno bipolar I o II). Las medidas recogidas al comienzo del estudio y durante el seguimiento se redujeron utilizando análisis de factores y los factores (tanto en la línea de base como en la visita anterior a la conversión o al último contacto) se evaluaron como predictores de trastornos del espectro bipolar de nuevo inicio.

**Resultados:** En relación a los niños de comparación, los niños en riesgo y bipolares tuvieron niveles basales más altos de síntomas de ansiedad/depresión, desinhibición/falta de atención, externalización, maníacos subsindrómicos y de labilidad afectiva. Los predictores más fuertes de los trastornos del espectro bipolar de nuevo inicio fueron ansiedad/depresión en la evaluación inicial, labilidad afectiva al comienzo y en la evaluación proximal, y síntomas maníacos

subsindrómicos en la evaluación proximal ( $<0.05$ ). Mientras que la labilidad afectiva y la ansiedad/depresión aumentaron a lo largo del seguimiento en aquellos que posteriormente desarrollaron un trastorno del espectro bipolar, los síntomas maníacos aumentaron hasta el punto de conversión. Un análisis de ruta apoyó la hipótesis que la labilidad afectiva al comienzo predice un trastorno del espectro bipolar de nuevo inicio parcialmente a través de los síntomas maníacos aumentados en la consulta anterior a la conversión; anteriormente se asoció de forma significativa la edad de los padres al inicio del trastorno del ánimo con un riesgo aumentado de conversión. Mientras los jóvenes sin ansiedad/depresión, labilidad afectiva ni manía (y con uno de los padres de mayor edad en el inicio del trastorno del ánimo) tuvieron una probabilidad pronosticada de conversión a trastorno del espectro bipolar del 2%, aquellos con todos los factores de riesgo tuvieron una probabilidad pronosticada de conversión del 49%.

**Conclusiones:** Las medidas dimensionales de ansiedad/depresión, labilidad afectiva y manía son predictores importantes de los trastornos del espectro bipolar de nuevo inicio en los jóvenes en riesgo. Estos síntomas se seleccionaron de entre otros numerosos candidatos, lo que resalta la utilidad potencial clínica e investigativa de estos hallazgos.

(*Am J Psychiatry* 2016; 173:695–704)

# Angustia durante el embarazo: Regulación epigenética de los genes relacionados con los glucocorticoides en la placenta y del neurocomportamiento fetal

Catherine Monk, Ph.D., Tianshu Feng, M.S., Seonjoo Lee, Ph.D., Izabela Krupska, M.A., Frances A. Champagne, Ph.D., Benjamin Tycko, M.D., Ph.D.

**Objetivo:** Se observa un riesgo aumentado de psicopatología en niños expuestos a la angustia materna prenatal, y el cortisol materno elevado y la regulación epigenética de los genes de las vías glucocorticoides en la placenta son mecanismos potenciales. Los autores examinaron la angustia materna y el cortisol salival en relación con el movimiento fetal y el ritmo cardíaco («acoplamiento») y la metilación del ADN de tres genes de las vías glucocorticoides—HSD11B2, NR3C1 y FKBP5—en placentas a término.

**Método:** Se recogieron cuestionarios sobre el ánimo y el cortisol salivar de 61 mujeres entre 24 y 27 semanas de gestación, y se realizó una evaluación fetal entre las semanas 34 y 37. Se analizó la metilación CpG en la placenta en los tres genes utilizando *450K Beadchips* y secuenciación de bisulfato; se evaluaron las correlaciones entre las variables maternas y fetales y la metilación de ADN; y se investigaron los efectos de la angustia materna en el comportamiento fetal a través de la metilación de ADN.

**Resultados:** El estrés percibido (Escala de Estrés Percibido),

pero no el cortisol, se asoció con metilación CpG alterada en las placentas. En el tercil superior de la Escala de Estrés Percibido, los datos de *Beadchip* revelaron metilación modestamente elevada del gen HSD11B2, asociada con acoplamiento fetal más bajo ( $\beta = -0,51$ ), y metilación modestamente elevada de FKBP5, también con acoplamiento fetal más bajo ( $\beta = -0,47$ ). Estos aumentos en metilación fueron validados con secuenciación de bisulfato, en la que se dieron en una minoría de clones.

**Conclusiones:** Este es el primer estudio que relaciona los efectos de la angustia de mujeres embarazadas en el feto y los cambios epigenéticos en los genes placentarios. Dado que el aumento de la metilación de ADN en los genes HSD11B2 y FKBP5 se ve en una minoría de clones de secuenciación de bisulfato, estos cambios epigenéticos y las consecuencias funcionales pueden afectar subpoblaciones de células placentarias.

(*Am J Psychiatry* 2016; 173:705–713)

## Fosfodiesterasa 10A en esquizofrenia: Un estudio con PET utilizando [<sup>11</sup>C]IMA107

Tiago Reis Marques, M.D., Ph.D., Sridhar Natesan, M.Pharm., Ph.D., Flavia Niccolini, M.D., Marios Politis, M.D., Ph.D., Roger N. Gunn, Ph.D., Graham E. Searle, Ph.D., Oliver Howes, M.D., Ph.D., Eugenii A. Rabiner, M.B.B.Ch., F.C.Psych.(S.A.), Shitij Kapur, M.D., Ph.D.

**Objetivo:** La fosfodiesterasa 10A (PDE10A) es una enzima presente en las neuronas espinosas medianas del cuerpo estriado, que degrada los mensajeros secundarios intracelulares, desencadenada por la señalización de la dopamina. La industria farmacéutica tiene un interés considerable en los inhibidores del gen PDE10A porque se ha demostrado que tienen un efecto similar al de los antipsicóticos en los modelos animales. Sin embargo, se desconoce el estatus del gen PDE10A en la esquizofrenia. Utilizando un radioligando desarrollado y validado recientemente, [<sup>11</sup>C]IMA107, los autores reportan la primera evaluación en vivo de la expresión cerebral del gen PDE10A en pacientes con esquizofrenia.

**Método:** Los autores compararon la disponibilidad del gen PDE10A en el cerebro de 12 pacientes con esquizofrenia crónica y 12 sujetos sanos de comparación, utilizando tomografía por emisión de positrones (PET) con [<sup>11</sup>C]IMA107. Se generaron estimaciones regionales del potencial de ligamiento (BPND) del [<sup>11</sup>C]IMA107 a partir de escáners PET utilizando el modelo de tejido de referencia simplificado, con el cerebelo como tejido de referencia para ligamiento no específico.

**Resultados:** No hubo ninguna diferencia significativa en las BPND de [<sup>11</sup>C]IMA107 entre los pacientes de esquizofrenia y los sujetos de comparación en ninguna de las regiones cerebrales estudiadas (tálamo, caudado, putamen, núcleo acumens, globus pallidus y substancia nigra). Tampoco hubo ninguna correlación significativa entre las BPND de [<sup>11</sup>C]IMA107 y la severidad de los síntomas psicóticos o la dosis de antipsicóticos.

**Conclusiones:** Los pacientes con esquizofrenia tienen una disponibilidad normal de PDE10A en regiones cerebrales que se cree que están implicadas en la fisiopatología de este trastorno. Los hallazgos no apoyan la propuesta de una disponibilidad de PDE10A alterada en esquizofrenia. Se debate la implicación de este hallazgo para el desarrollo de nuevas medicinas.

*(Am J Psychiatry 2016; 173:714–721)*



## Correlatos neurales de la irritabilidad en los trastornos bipolar y de desregulación disruptiva del ánimo

Jillian Lee Wiggins, Ph.D., Melissa A. Brotman, Ph.D., Nancy E. Adleman, Ph.D., Pilyoung Kim, Ph.D., Allison H. Oakes, B.A., Richard C. Reynolds, M.S., Gang Chen, Ph.D., Daniel S. Pine, M.D., Ellen Leibenluft, M.D.

**Objetivo:** El trastorno bipolar y el trastorno de desregulación disruptiva del ánimo (DMDD, por sus siglas en inglés) están clínica y fisiopatológicamente bien diferenciados, pero la irritabilidad puede ser un rasgo clínico de ambas enfermedades. Los autores examinan si los mecanismos neurales que median la irritabilidad difieren entre el trastorno bipolar y el DMDD, utilizando un paradigma de reconocimiento de emociones faciales, porque dicho reconocimiento es deficiente en ambos grupos de pacientes. La hipótesis de los autores fue que durante el reconocimiento de emociones faciales, la irritabilidad se asociaría con la activación disfuncional en la amígdala y otras regiones temporales y prefrontales en ambos trastornos, pero que la naturaleza de dichas asociaciones sería diferente entre el DMDD y el trastorno bipolar.

**Método:** Durante la adquisición de IRM funcional, 71 jóvenes (25 con DMDD, 24 con trastorno bipolar y 22 jóvenes sanos) realizaron una tarea de reconocimiento con caras que expresaban alegría, miedo e ira con intensidad emocional variable.

**Resultados:** Los participantes con DMDD y trastorno bipolar mostraron niveles similares de irritabilidad y no se diferencia-

ron ni entre ellos ni de los jóvenes sanos en la precisión al reconocer emociones faciales. La irritabilidad estuvo correlacionada con la actividad de la amígdala en todas las intensidades para todas las emociones en el grupo de DMDD; dicha correlación se observó en el grupo de trastorno bipolar sólo para las caras que expresaban miedo. En la ruta visual ventral, las asociaciones entre la actividad neural y la irritabilidad se encontraron de forma más consistente en el grupo de DMDD que en el grupo de trastorno bipolar, especialmente en respuesta a caras de ira ambiguas.

**Conclusiones:** Estos resultados sugieren especificidad diagnóstica en los correlatos neurales de irritabilidad, un síntoma tanto del DMDD como del trastorno bipolar. Esta evidencia de correlatos neurales bien definidos sugiere la necesidad de evaluar diferentes enfoques para tratar la irritabilidad en los dos trastornos.

*(Am J Psychiatry 2016; 173:722–730)*
